# Supplementary material for: Impact of Preanalytical Variables on Urinary Cell-Free DNA Quality: Centrifugation, EDTA Concentration, Storage and Thawing Strategies
Source: Research Square preprint supplement (doi:10.21203/rs.3.rs-7478319/v1), 2025-09-18
Supplement: Supplementary file 2 [file fadc8b0b914c8d07bf826027.xlsx]

## Sheet: Source Data
	Source data of main figures
		Figure 1B						Figure 2B						Figure 3B,3H						Figure 5A,5G						Figure 6B,6C
		Sample ID	Groups	TDNA Yield (pg/mL)	ucfDNA Yield (pg/mL)	cfDNA score (cfDNA%)		Sample ID	Groups	TDNA Yield (pg/mL)	ucfDNA Yield (pg/mL)	cfDNA score (cfDNA%)		Sample ID	Groups	TDNA Yield (pg/mL)	ucfDNA Yield (pg/mL)	cfDNA score (cfDNA%)		Sample ID	Groups	TDNA Yield (pg/mL)	ucfDNA Yield (pg/mL)	cfDNA score (cfDNA%)		Sample ID	Groups	TDNA Yield (pg/mL)	ucfDNA Yield (pg/mL)	cfDNA score (cfDNA%)
		1-1	Baseline	1790	1120	62.89		1-1	Baseline	2290	1450	63.33		1-1	Baseline	2300	1350	58.68		1-1	Baseline	2300	1350	58.68		1-1	Baseline	2600	1700	65.59
		1-2	Baseline	1710	1020	59.84		1-2	Baseline	2080	1360	65.45		1-2	Baseline	2325	1400	60.19		1-2	Baseline	2325	1400	60.19		1-2	Baseline	3157.14	2128.57	67.41
		1-3	Baseline	1850	1140	61.79		1-3	Baseline	2200	1440	65.36		1-3	Baseline	2050	1197.5	58.53		1-3	Baseline	2050	1197.5	58.53		1-3	Baseline	3242.86	2114.29	65.32
		2-1	0 mM EDTA-treated WU stored at RT for 1 day	809	1.82	0.22		2-1	0 mM EDTA-treated US stored at RT for 1 day	375	84.8	22.59		2-1	FWU thawed at 4℃ for 16 hours	866.25	620	71.66		13-1	10 mM EDTA-treated FWU thawed at 4℃ for 16 hours	1518.75	386.438	25.48		2-1	10 mM EDTA-treated FUS stored at -20℃ for 1 month	3014.29	1985.71	65.74
		2-2	0 mM EDTA-treated WU stored at RT for 1 day	842	23.7	2.81		2-2	0 mM EDTA-treated US stored at RT for 1 day	462	135	29.32		2-2	FWU thawed at 4℃ for 16 hours	711.25	502.5	70.73		13-2	10 mM EDTA-treated FWU thawed at 4℃ for 16 hours	1250	482.5	38.51		2-2	10 mM EDTA-treated FUS stored at -20℃ for 1 month	2928.57	1985.71	67.57
		2-3	0 mM EDTA-treated WU stored at RT for 1 day	881	63.8	7.25		2-3	0 mM EDTA-treated US stored at RT for 1 day	467	126	26.94		2-3	FWU thawed at 4℃ for 16 hours	623.75	428.75	68.8		13-3	10 mM EDTA-treated FWU thawed at 4℃ for 16 hours	1700	637.5	37.36		2-3	10 mM EDTA-treated FUS stored at -20℃ for 1 month	3128.57	2042.86	65.17
		3-1	0 mM EDTA-treated WU stored at RT for 3 days	Marker(s) not detected; Caution! %cfDNA Edited (Region changed)				3-1	0 mM EDTA-treated US stored at RT for 3 days	Marker(s) not detected; Caution! %cfDNA Edited (Region changed)				3-1	FWU thawed at RT (18–20℃) for 3.5 hours	1812.5	1487.5	82.47		14-1	10 mM EDTA-treated FWU thawed at RT (18–20℃) for 3.5 hours	5575	2137.5	38.38		3-1	10 mM EDTA-treated FUS stored at -20℃ for 2 months	652.857	382.857	58.7
		3-2	0 mM EDTA-treated WU stored at RT for 3 days					3-2	0 mM EDTA-treated US stored at RT for 3 days					3-2	FWU thawed at RT (18–20℃) for 3.5 hours	1712.5	1475	85.88		14-2	10 mM EDTA-treated FWU thawed at RT (18–20℃) for 3.5 hours	6362.5	2400	37.84		3-2	10 mM EDTA-treated FUS stored at -20℃ for 2 months	544.286	332.857	61.24
		3-3	0 mM EDTA-treated WU stored at RT for 3 days					3-3	0 mM EDTA-treated US stored at RT for 3 days					3-3	FWU thawed at RT (18–20℃) for 3.5 hours	1687.5	1412.5	84.07		14-3	10 mM EDTA-treated FWU thawed at RT (18–20℃) for 3.5 hours	5787.5	2162.5	37.47		3-3	10 mM EDTA-treated FUS stored at -20℃ for 2 months	590	362.857	61.51
		4-1	0 mM EDTA-treated WU stored at RT for 7 days	Marker(s) not detected; Caution! %cfDNA Edited (Region changed)				4-1	0 mM EDTA-treated US stored at RT for 7 days	Marker(s) not detected; Caution! %cfDNA Edited (Region changed)				4-1	FWU thawed at 37℃ for approximately 15 minutes	2025	1562.5	77.31		15-1	10 mM EDTA-treated FWU thawed at 37℃ for approximately 15 minutes	5837.5	2187.5	37.46		5-1	10 mM EDTA-treated FUS stored at -80℃ for 1 month	2971.43	1942.86	65.38
		4-2	0 mM EDTA-treated WU stored at RT for 7 days					4-2	0 mM EDTA-treated US stored at RT for 7 days					4-2	FWU thawed at 37℃ for approximately 15 minutes	1900	1462.5	77.34		15-2	10 mM EDTA-treated FWU thawed at 37℃ for approximately 15 minutes	7012.5	2612.5	37.33		5-2	10 mM EDTA-treated FUS stored at -80℃ for 1 month	2800	1857.14	66.04
		4-3	0 mM EDTA-treated WU stored at RT for 7 days					4-3	0 mM EDTA-treated US stored at RT for 7 days					4-3	FWU thawed at 37℃ for approximately 15 minutes	1750	1335.94	76.27		15-3	10 mM EDTA-treated FWU thawed at 37℃ for approximately 15 minutes	9275	2400	25.85		5-3	10 mM EDTA-treated FUS stored at -80℃ for 1 month	2700	1842.86	68.35
																										6-1	10 mM EDTA-treated FUS stored at -80℃ for 2 months	3071.43	2114.29	69.1
		Figure 1C,1F						Figure 2C,2F						Figure 3C,3I						Figure 5B,5H						6-2	10 mM EDTA-treated FUS stored at -80℃ for 2 months	2685.71	1785.71	66.59
		Sample ID	Groups	TDNA Yield (pg/mL)	ucfDNA Yield (pg/mL)	cfDNA score (cfDNA%)		Sample ID	Groups	TDNA Yield (pg/mL)	ucfDNA Yield (pg/mL)	cfDNA score (cfDNA%)		Sample ID	Groups	TDNA Yield (pg/mL)	ucfDNA Yield (pg/mL)	cfDNA score (cfDNA%)		Sample ID	Groups	TDNA Yield (pg/mL)	ucfDNA Yield (pg/mL)	cfDNA score (cfDNA%)		6-3	10 mM EDTA-treated FUS stored at -80℃ for 2 months	2657.14	1800	67.71
		1-1	Baseline	1790	1120	62.89		1-1	Baseline	2290	1450	63.33		1-1	Baseline	2300	1350	58.68		1-1	Baseline	2300	1350	58.68		7-1	10 mM EDTA-treated FUS stored at -80℃ for 3 months	3042.86	2128.57	69.97
		1-2	Baseline	1710	1020	59.84		1-2	Baseline	2080	1360	65.45		1-2	Baseline	2325	1400	60.19		1-2	Baseline	2325	1400	60.19		7-2	10 mM EDTA-treated FUS stored at -80℃ for 3 months	3357.14	2314.29	68.98
		1-3	Baseline	1850	1140	61.79		1-3	Baseline	2200	1440	65.36		1-3	Baseline	2050	1197.5	58.53		1-3	Baseline	2050	1197.5	58.53		7-3	10 mM EDTA-treated FUS stored at -80℃ for 3 months	2885.71	2042.86	70.87
		5-1	5 mM EDTA-treated WU stored at RT for 1 day	1330	580	43.57		5-1	5 mM EDTA-treated US stored at RT for 1 day	1760	1190	67.43		5-1	FUS thawed at 4℃ for 16 hours	1923.75	1491.75	77.74		16-1	10 mM EDTA-treated FUS thawed at 4℃ for 16 hours	2162.5	1250	58.11
		5-2	5 mM EDTA-treated WU stored at RT for 1 day	1640	656	40.11		5-2	5 mM EDTA-treated US stored at RT for 1 day	1710	1100	64.3		5-2	FUS thawed at 4℃ for 16 hours	2000	1587.5	79.51		16-2	10 mM EDTA-treated FUS thawed at 4℃ for 16 hours	2100	1218.75	58.16		Figure 6D
		5-3	5 mM EDTA-treated WU stored at RT for 1 day	1110	456	41.03		5-3	5 mM EDTA-treated US stored at RT for 1 day	1980	1250	63.5		5-3	FUS thawed at 4℃ for 16 hours	1850	1512.5	82.12		16-3	10 mM EDTA-treated FUS thawed at 4℃ for 16 hours	2187.5	1236.25	56.54		Sample ID	Groups	TDNA Yield (pg/mL)	ucfDNA Yield (pg/mL)	cfDNA score (cfDNA%)
		8-1	10 mM EDTA-treated WU stored at RT for 1 day	1500	619	41.21		8-1	10 mM EDTA-treated US stored at RT for 1 day	1910	1230	64.53		6-1	FUS thawed at RT (18–20℃) for 3.5 hours	2075	1625	78.7		17-1	10 mM EDTA-treated FUS thawed at RT (18–20℃) for 3.5 hours	2187.5	1312.5	60.16		1-1	Baseline	2600	1700	65.59
		8-2	10 mM EDTA-treated WU stored at RT for 1 day	2290	880	38.37		8-2	10 mM EDTA-treated US stored at RT for 1 day	2490	1590	63.9		6-2	FUS thawed at RT (18–20℃) for 3.5 hours	1800	1537.5	85.19		17-2	10 mM EDTA-treated FUS thawed at RT (18–20℃) for 3.5 hours	2475	1487.5	60.24		1-2	Baseline	3157.14	2128.57	67.41
		8-3	10 mM EDTA-treated WU stored at RT for 1 day	1560	541	34.68		8-3	10 mM EDTA-treated US stored at RT for 1 day	2720	1670	61.52		6-3	FUS thawed at RT (18–20℃) for 3.5 hours	2150	1687.5	78.39		17-3	10 mM EDTA-treated FUS thawed at RT (18–20℃) for 3.5 hours	1662.5	985	59.22		1-3	Baseline	3242.86	2114.29	65.32
		11-1	20 mM EDTA-treated WU stored at RT for 1 day	2110	860	40.71		11-1	20 mM EDTA-treated US stored at RT for 1 day	2450	1540	62.76		7-1	FUS thawed at 37℃ for approximately 15 minutes	1812.5	1350	74.27		18-1	10 mM EDTA-treated FUS thawed at 37℃ for approximately 15 minutes	2300	1350	58.8		4-1	10 mM EDTA-treated FUS stored at -20℃ for 3 months	71.1429	52.5714	73.74
		11-2	20 mM EDTA-treated WU stored at RT for 1 day	1790	796	44.59		11-2	20 mM EDTA-treated US stored at RT for 1 day	2520	1590	63.04		7-2	FUS thawed at 37℃ for approximately 15 minutes	2025	1550	76.38		18-2	10 mM EDTA-treated FUS thawed at 37℃ for approximately 15 minutes	2325	1400	60.44		4-2	10 mM EDTA-treated FUS stored at -20℃ for 3 months	43.4286	30.5714	70.27
		11-3	20 mM EDTA-treated WU stored at RT for 1 day	1890	748	39.56		11-3	20 mM EDTA-treated US stored at RT for 1 day	2300	1440	62.7		7-3	FUS thawed at 37℃ for approximately 15 minutes	2012.5	1462.5	72.8		18-3	10 mM EDTA-treated FUS thawed at 37℃ for approximately 15 minutes	2350	1400	59.98		4-3	10 mM EDTA-treated FUS stored at -20℃ for 3 months	74	55.5714	75.22
		14-1	40 mM EDTA-treated WU stored at RT for 1 day	2580	1030	39.99		14-1	40 mM EDTA-treated US stored at RT for 1 day	1440	887	61.42
		14-2	40 mM EDTA-treated WU stored at RT for 1 day	3050	996	32.68		14-2	40 mM EDTA-treated US stored at RT for 1 day	1650	979	59.32		Figure 3D,3J						Figure 5C,5I
		14-3	40 mM EDTA-treated WU stored at RT for 1 day	2570	945	36.82		14-3	40 mM EDTA-treated US stored at RT for 1 day	1540	977	63.36		Sample ID	Groups	TDNA Yield (pg/mL)	ucfDNA Yield (pg/mL)	cfDNA score (cfDNA%)		Sample ID	Groups	TDNA Yield (pg/mL)	ucfDNA Yield (pg/mL)	cfDNA score (cfDNA%)
														1-1	Baseline	2300	1350	58.68		1-1	Baseline	2300	1350	58.68
		Figure 1D,1G						Figure 2D,2G						1-2	Baseline	2325	1400	60.19		1-2	Baseline	2325	1400	60.19
		Sample ID	Groups	TDNA Yield (pg/mL)	ucfDNA Yield (pg/mL)	cfDNA score (cfDNA%)		Sample ID	Groups	TDNA Yield (pg/mL)	ucfDNA Yield (pg/mL)	cfDNA score (cfDNA%)		1-3	Baseline	2050	1197.5	58.53		1-3	Baseline	2050	1197.5	58.53
		1-1	Baseline	1790	1120	62.89		1-1	Baseline	2290	1450	63.33		8-1	FUSS thawed at 4℃ for 16 hours	28.5	12.3125	43.12		19-1	10 mM EDTA-treated FUSS thawed at 4℃ for 16 hours	206.25	167.5	81.17
		1-2	Baseline	1710	1020	59.84		1-2	Baseline	2080	1360	65.45		8-2	FUSS thawed at 4℃ for 16 hours	40.375	26.125	64.76		19-2	10 mM EDTA-treated FUSS thawed at 4℃ for 16 hours	333.75	233.75	69.9
		1-3	Baseline	1850	1140	61.79		1-3	Baseline	2200	1440	65.36		8-3	FUSS thawed at 4℃ for 16 hours	135	85.875	63.8		19-3	10 mM EDTA-treated FUSS thawed at 4℃ for 16 hours	538.75	376.25	69.76
		6-1	5 mM EDTA-treated WU stored at RT for 3 days	1940	710	36.52		6-1	5 mM EDTA-treated US stored at RT for 3 days	1970	1300	66.13		9-1	FUSS thawed at RT (18–20℃) for 3.5 hours	272.5	168.75	62.04		20-1	10 mM EDTA-treated FUSS thawed at RT (18–20℃) for 3.5 hours	2087.5	1325	63.49
		6-2	5 mM EDTA-treated WU stored at RT for 3 days	1780	540	30.37		6-2	5 mM EDTA-treated US stored at RT for 3 days	1830	1280	70.16		9-2	FUSS thawed at RT (18–20℃) for 3.5 hours	368.75	333.75	90.59		20-2	10 mM EDTA-treated FUSS thawed at RT (18–20℃) for 3.5 hours	2137.5	1412.5	65.7
		6-3	5 mM EDTA-treated WU stored at RT for 3 days	1680	627	37.38		6-3	5 mM EDTA-treated US stored at RT for 3 days	1880	1310	69.48		9-3	FUSS thawed at RT (18–20℃) for 3.5 hours	242.5	213.75	88.22		20-3	10 mM EDTA-treated FUSS thawed at RT (18–20℃) for 3.5 hours	2025	1262.5	62.47
		9-1	10 mM EDTA-treated WU stored at RT for 3 days	2580	889	34.46		9-1	10 mM EDTA-treated US stored at RT for 3 days	2270	1480	65.29		10-1	FUSS thawed at 37℃ for approximately 15 minutes	851.389	731.944	86.02		21-1	10 mM EDTA-treated FUSS thawed at 37℃ for approximately 15 minutes	2187.5	1337.5	61.51
		9-2	10 mM EDTA-treated WU stored at RT for 3 days	3340	1150	34.42		9-2	10 mM EDTA-treated US stored at RT for 3 days	2310	1530	66.12		10-2	FUSS thawed at 37℃ for approximately 15 minutes	946.25	817.5	86.39		21-2	10 mM EDTA-treated FUSS thawed at 37℃ for approximately 15 minutes	2037.5	1275	62.81
		9-3	10 mM EDTA-treated WU stored at RT for 3 days	2440	824	33.72		9-3	10 mM EDTA-treated US stored at RT for 3 days	2210	1400	63.1		10-3	FUSS thawed at 37℃ for approximately 15 minutes	958.5	820.125	85.44		21-3	10 mM EDTA-treated FUSS thawed at 37℃ for approximately 15 minutes	1887.5	1176.25	62.27
		12-1	20 mM EDTA-treated WU stored at RT for 3 days	3350	660	19.71		12-1	20 mM EDTA-treated US stored at RT for 3 days	2290	1420	62.27
		12-2	20 mM EDTA-treated WU stored at RT for 3 days	3630	846	23.32		12-2	20 mM EDTA-treated US stored at RT for 3 days	1800	1100	60.9		Figure 3E						Figure 5D
		12-3	20 mM EDTA-treated WU stored at RT for 3 days	2880	739	25.69		12-3	20 mM EDTA-treated US stored at RT for 3 days	1640	992	60.65		Sample ID	Groups	TDNA Yield (pg/mL)	ucfDNA Yield (pg/mL)	cfDNA score (cfDNA%)		Sample ID	Groups	TDNA Yield (pg/mL)	ucfDNA Yield (pg/mL)	cfDNA score (cfDNA%)
		15-1	40 mM EDTA-treated WU stored at RT for 3 days	4400	935	21.24		15-1	40 mM EDTA-treated US stored at RT for 3 days	1690	942	55.83		1-1	Baseline	2300	1350	58.68		1-1	Baseline	2300	1350	58.68
		15-2	40 mM EDTA-treated WU stored at RT for 3 days	2710	783	28.89		15-2	40 mM EDTA-treated US stored at RT for 3 days	1310	779	59.28		1-2	Baseline	2325	1400	60.19		1-2	Baseline	2325	1400	60.19
		15-3	40 mM EDTA-treated WU stored at RT for 3 days	5040	1230	24.36		15-3	40 mM EDTA-treated US stored at RT for 3 days	1430	905	63.47		1-3	Baseline	2050	1197.5	58.53		1-3	Baseline	2050	1197.5	58.53
														2-1	FWU thawed at 4℃ for 16 hours	866.25	620	71.66		13-1	10 mM EDTA-treated FWU thawed at 4℃ for 16 hours	1518.75	386.438	25.48
		Figure 1E,1H						Figure 2E,2H						2-2	FWU thawed at 4℃ for 16 hours	711.25	502.5	70.73		13-2	10 mM EDTA-treated FWU thawed at 4℃ for 16 hours	1250	482.5	38.51
		Sample ID	Groups	TDNA Yield (pg/mL)	ucfDNA Yield (pg/mL)	cfDNA score (cfDNA%)		Sample ID	Groups	TDNA Yield (pg/mL)	ucfDNA Yield (pg/mL)	cfDNA score (cfDNA%)		2-3	FWU thawed at 4℃ for 16 hours	623.75	428.75	68.8		13-3	10 mM EDTA-treated FWU thawed at 4℃ for 16 hours	1700	637.5	37.36
		1-1	Baseline	1790	1120	62.89		1-1	Baseline	2290	1450	63.33		5-1	FUS thawed at 4℃ for 16 hours	1923.75	1491.75	77.74		16-1	10 mM EDTA-treated FUS thawed at 4℃ for 16 hours	2162.5	1250	58.11
		1-2	Baseline	1710	1020	59.84		1-2	Baseline	2080	1360	65.45		5-2	FUS thawed at 4℃ for 16 hours	2000	1587.5	79.51		16-2	10 mM EDTA-treated FUS thawed at 4℃ for 16 hours	2100	1218.75	58.16
		1-3	Baseline	1850	1140	61.79		1-3	Baseline	2200	1440	65.36		5-3	FUS thawed at 4℃ for 16 hours	1850	1512.5	82.12		16-3	10 mM EDTA-treated FUS thawed at 4℃ for 16 hours	2187.5	1236.25	56.54
		7-1	5 mM EDTA-treated WU stored at RT for 7 days	5120	1560	30.41		7-1	5 mM EDTA-treated US stored at RT for 7 days	1460	1020	69.82		8-1	FUSS thawed at 4℃ for 16 hours	28.5	12.3125	43.12		19-1	10 mM EDTA-treated FUSS thawed at 4℃ for 16 hours	206.25	167.5	81.17
		7-2	5 mM EDTA-treated WU stored at RT for 7 days	3380	985	29.11		7-2	5 mM EDTA-treated US stored at RT for 7 days	1620	1140	70.55		8-2	FUSS thawed at 4℃ for 16 hours	40.375	26.125	64.76		19-2	10 mM EDTA-treated FUSS thawed at 4℃ for 16 hours	333.75	233.75	69.9
		7-3	5 mM EDTA-treated WU stored at RT for 7 days	3490	1050	30.07		7-3	5 mM EDTA-treated US stored at RT for 7 days	1530	1080	70.24		8-3	FUSS thawed at 4℃ for 16 hours	135	85.875	63.8		19-3	10 mM EDTA-treated FUSS thawed at 4℃ for 16 hours	538.75	376.25	69.76
		10-1	10 mM EDTA-treated WU stored at RT for 7 days	3240	1080	33.26		10-1	10 mM EDTA-treated US stored at RT for 7 days	2040	1320	64.61
		10-2	10 mM EDTA-treated WU stored at RT for 7 days	3730	1210	32.43		10-2	10 mM EDTA-treated US stored at RT for 7 days	2330	1470	63.12		Figure 3F						Figure 5E
		10-3	10 mM EDTA-treated WU stored at RT for 7 days	3370	1090	32.34		10-3	10 mM EDTA-treated US stored at RT for 7 days	2200	1340	61.05		Sample ID	Groups	TDNA Yield (pg/mL)	ucfDNA Yield (pg/mL)	cfDNA score (cfDNA%)		Sample ID	Groups	TDNA Yield (pg/mL)	ucfDNA Yield (pg/mL)	cfDNA score (cfDNA%)
		13-1	20 mM EDTA-treated WU stored at RT for 7 days	3400	747	21.95		13-1	20 mM EDTA-treated US stored at RT for 7 days	1710	1030	60.06		1-1	Baseline	2300	1350	58.68		1-1	Baseline	2300	1350	58.68
		13-2	20 mM EDTA-treated WU stored at RT for 7 days	4000	962	24.03		13-2	20 mM EDTA-treated US stored at RT for 7 days	1500	893	59.36		1-2	Baseline	2325	1400	60.19		1-2	Baseline	2325	1400	60.19
		13-3	20 mM EDTA-treated WU stored at RT for 7 days	4070	804	19.75		13-3	20 mM EDTA-treated US stored at RT for 7 days	1640	992	60.62		1-3	Baseline	2050	1197.5	58.53		1-3	Baseline	2050	1197.5	58.53
		16-1	40 mM EDTA-treated WU stored at RT for 7 days	2960	713	30.86		16-1	40 mM EDTA-treated US stored at RT for 7 days	1730	943	54.41		3-1	FWU thawed at RT (18–20℃) for 3.5 hours	1812.5	1487.5	82.47		14-1	10 mM EDTA-treated FWU thawed at RT (18–20℃) for 3.5 hours	5575	2137.5	38.38
		16-2	40 mM EDTA-treated WU stored at RT for 7 days	3190	722	22.63		16-2	40 mM EDTA-treated US stored at RT for 7 days	1560	883	56.5		3-2	FWU thawed at RT (18–20℃) for 3.5 hours	1712.5	1475	85.88		14-2	10 mM EDTA-treated FWU thawed at RT (18–20℃) for 3.5 hours	6362.5	2400	37.84
		16-3	40 mM EDTA-treated WU stored at RT for 7 days	2870	1020	35.42		16-3	40 mM EDTA-treated US stored at RT for 7 days	1970	1070	54.22		3-3	FWU thawed at RT (18–20℃) for 3.5 hours	1687.5	1412.5	84.07		14-3	10 mM EDTA-treated FWU thawed at RT (18–20℃) for 3.5 hours	5787.5	2162.5	37.47
														6-1	FUS thawed at RT (18–20℃) for 3.5 hours	2075	1625	78.7		17-1	10 mM EDTA-treated FUS thawed at RT (18–20℃) for 3.5 hours	2187.5	1312.5	60.16
														6-2	FUS thawed at RT (18–20℃) for 3.5 hours	1800	1537.5	85.19		17-2	10 mM EDTA-treated FUS thawed at RT (18–20℃) for 3.5 hours	2475	1487.5	60.24
														6-3	FUS thawed at RT (18–20℃) for 3.5 hours	2150	1687.5	78.39		17-3	10 mM EDTA-treated FUS thawed at RT (18–20℃) for 3.5 hours	1662.5	985	59.22
														9-1	FUSS thawed at RT (18–20℃) for 3.5 hours	272.5	168.75	62.04		20-1	10 mM EDTA-treated FUSS thawed at RT (18–20℃) for 3.5 hours	2087.5	1325	63.49
														9-2	FUSS thawed at RT (18–20℃) for 3.5 hours	368.75	333.75	90.59		20-2	10 mM EDTA-treated FUSS thawed at RT (18–20℃) for 3.5 hours	2137.5	1412.5	65.7
														9-3	FUSS thawed at RT (18–20℃) for 3.5 hours	242.5	213.75	88.22		20-3	10 mM EDTA-treated FUSS thawed at RT (18–20℃) for 3.5 hours	2025	1262.5	62.47
														Figure 3G						Figure 5F
														Sample ID	Groups	TDNA Yield (pg/mL)	ucfDNA Yield (pg/mL)	cfDNA score (cfDNA%)		Sample ID	Groups	TDNA Yield (pg/mL)	ucfDNA Yield (pg/mL)	cfDNA score (cfDNA%)
														1-1	Baseline	2300	1350	58.68		1-1	Baseline	2300	1350	58.68
														1-2	Baseline	2325	1400	60.19		1-2	Baseline	2325	1400	60.19
														1-3	Baseline	2050	1197.5	58.53		1-3	Baseline	2050	1197.5	58.53
														4-1	FWU thawed at 37℃ for approximately 15 minutes	2025	1562.5	77.31		15-1	10 mM EDTA-treated FWU thawed at 37℃ for approximately 15 minutes	5837.5	2187.5	37.46
														4-2	FWU thawed at 37℃ for approximately 15 minutes	1900	1462.5	77.34		15-2	10 mM EDTA-treated FWU thawed at 37℃ for approximately 15 minutes	7012.5	2612.5	37.33
														4-3	FWU thawed at 37℃ for approximately 15 minutes	1750	1335.94	76.27		15-3	10 mM EDTA-treated FWU thawed at 37℃ for approximately 15 minutes	9275	2400	25.85
														7-1	FUS thawed at 37℃ for approximately 15 minutes	1812.5	1350	74.27		18-1	10 mM EDTA-treated FUS thawed at 37℃ for approximately 15 minutes	2300	1350	58.8
														7-2	FUS thawed at 37℃ for approximately 15 minutes	2025	1550	76.38		18-2	10 mM EDTA-treated FUS thawed at 37℃ for approximately 15 minutes	2325	1400	60.44
														7-3	FUS thawed at 37℃ for approximately 15 minutes	2012.5	1462.5	72.8		18-3	10 mM EDTA-treated FUS thawed at 37℃ for approximately 15 minutes	2350	1400	59.98
														10-1	FUSS thawed at 37℃ for approximately 15 minutes	851.389	731.944	86.02		21-1	10 mM EDTA-treated FUSS thawed at 37℃ for approximately 15 minutes	2187.5	1337.5	61.51
														10-2	FUSS thawed at 37℃ for approximately 15 minutes	946.25	817.5	86.39		21-2	10 mM EDTA-treated FUSS thawed at 37℃ for approximately 15 minutes	2037.5	1275	62.81
														10-3	FUSS thawed at 37℃ for approximately 15 minutes	958.5	820.125	85.44		21-3	10 mM EDTA-treated FUSS thawed at 37℃ for approximately 15 minutes	1887.5	1176.25	62.27
	Source data of supplementary figures
		Figure S1A,S1B						Figure S2A,S2B
		Sample ID	Groups	TDNA Yield (pg/mL)	ucfDNA Yield (pg/mL)	cfDNA score (cfDNA%)		Sample ID	Groups	TDNA Yield (pg/mL)	ucfDNA Yield (pg/mL)	cfDNA score (cfDNA%)
		1-1	Baseline	1790	1120	62.89		1-1	Baseline	2300	1350	58.68
		1-2	Baseline	1710	1020	59.84		1-2	Baseline	2325	1400	60.19
		1-3	Baseline	1850	1140	61.79		1-3	Baseline	2050	1197.5	58.53
		5-1	5 mM EDTA-treated WU stored at RT for 1 day	1330	580	43.57		11-1	10 mM EDTA-treated WU stored at RT for 7 days	7500	2662.5	35.59
		5-2	5 mM EDTA-treated WU stored at RT for 1 day	1640	656	40.11		11-2	10 mM EDTA-treated WU stored at RT for 7 days	7487.5	2725	36.36
		5-3	5 mM EDTA-treated WU stored at RT for 1 day	1110	456	41.03		11-3	10 mM EDTA-treated WU stored at RT for 7 days	7137.5	2525	35.42
		6-1	5 mM EDTA-treated US stored at RT for 3 days	1970	1300	66.13		12-1	10 mM EDTA-treated US stored at RT for 7 days	2200	1325	60.09
		6-2	5 mM EDTA-treated US stored at RT for 3 days	1830	1280	70.16		12-2	10 mM EDTA-treated US stored at RT for 7 days	2275	1400	61.43
		6-3	5 mM EDTA-treated US stored at RT for 3 days	1880	1310	69.48		12-3	10 mM EDTA-treated US stored at RT for 7 days	2225	1350	60.27
		7-1	5 mM EDTA-treated WU stored at RT for 7 days	5120	1560	30.41
		7-2	5 mM EDTA-treated WU stored at RT for 7 days	3380	985	29.11		Figure S2C
		7-3	5 mM EDTA-treated WU stored at RT for 7 days	3490	1050	30.07		Sample ID	Groups	TDNA Yield (pg/mL)	ucfDNA Yield (pg/mL)	cfDNA score (cfDNA%)
		8-1	10 mM EDTA-treated WU stored at RT for 1 day	1500	619	41.21		11-1	10 mM EDTA-treated WU stored at RT for 7 days	7500	2662.5	35.59
		8-2	10 mM EDTA-treated WU stored at RT for 1 day	2290	880	38.37		11-2	10 mM EDTA-treated WU stored at RT for 7 days	7487.5	2725	36.36
		8-3	10 mM EDTA-treated WU stored at RT for 1 day	1560	541	34.68		11-3	10 mM EDTA-treated WU stored at RT for 7 days	7137.5	2525	35.42
		9-1	10 mM EDTA-treated WU stored at RT for 3 days	2580	889	34.46		13-1	10 mM EDTA-treated FWU thawed at 4℃ for 16 hours	1518.75	386.438	25.48
		9-2	10 mM EDTA-treated WU stored at RT for 3 days	3340	1150	34.42		13-2	10 mM EDTA-treated FWU thawed at 4℃ for 16 hours	1250	482.5	38.51
		9-3	10 mM EDTA-treated WU stored at RT for 3 days	2440	824	33.72		13-3	10 mM EDTA-treated FWU thawed at 4℃ for 16 hours	1700	637.5	37.36
		10-1	10 mM EDTA-treated WU stored at RT for 7 days	3240	1080	33.26		14-1	10 mM EDTA-treated FWU thawed at RT (18–20℃) for 3.5 hours	5575	2137.5	38.38
		10-2	10 mM EDTA-treated WU stored at RT for 7 days	3730	1210	32.43		14-2	10 mM EDTA-treated FWU thawed at RT (18–20℃) for 3.5 hours	6362.5	2400	37.84
		10-3	10 mM EDTA-treated WU stored at RT for 7 days	3370	1090	32.34		14-3	10 mM EDTA-treated FWU thawed at RT (18–20℃) for 3.5 hours	5787.5	2162.5	37.47
		11-1	20 mM EDTA-treated WU stored at RT for 1 day	2110	860	40.71		15-1	10 mM EDTA-treated FWU thawed at 37℃ for approximately 15 minutes	5837.5	2187.5	37.46
		11-2	20 mM EDTA-treated WU stored at RT for 1 day	1790	796	44.59		15-2	10 mM EDTA-treated FWU thawed at 37℃ for approximately 15 minutes	7012.5	2612.5	37.33
		11-3	20 mM EDTA-treated WU stored at RT for 1 day	1890	748	39.56		15-3	10 mM EDTA-treated FWU thawed at 37℃ for approximately 15 minutes	9275	2400	25.85
		12-1	20 mM EDTA-treated WU stored at RT for 3 days	3350	660	19.71
		12-2	20 mM EDTA-treated WU stored at RT for 3 days	3630	846	23.32		Figure S2D
		12-3	20 mM EDTA-treated WU stored at RT for 3 days	2880	739	25.69		Sample ID	Groups	TDNA Yield (pg/mL)	ucfDNA Yield (pg/mL)	cfDNA score (cfDNA%)
		13-1	20 mM EDTA-treated WU stored at RT for 7 days	3400	747	21.95		12-1	10 mM EDTA-treated US stored at RT for 7 days	2200	1325	60.09
		13-2	20 mM EDTA-treated WU stored at RT for 7 days	4000	962	24.03		12-2	10 mM EDTA-treated US stored at RT for 7 days	2275	1400	61.43
		13-3	20 mM EDTA-treated WU stored at RT for 7 days	4070	804	19.75		12-3	10 mM EDTA-treated US stored at RT for 7 days	2225	1350	60.27
		14-1	40 mM EDTA-treated WU stored at RT for 1 day	2580	1030	39.99		16-1	10 mM EDTA-treated FUS thawed at 4℃ for 16 hours	2162.5	1250	58.11
		14-2	40 mM EDTA-treated WU stored at RT for 1 day	3050	996	32.68		16-2	10 mM EDTA-treated FUS thawed at 4℃ for 16 hours	2100	1218.75	58.16
		14-3	40 mM EDTA-treated WU stored at RT for 1 day	2570	945	36.82		16-3	10 mM EDTA-treated FUS thawed at 4℃ for 16 hours	2187.5	1236.25	56.54
		15-1	40 mM EDTA-treated WU stored at RT for 3 days	4400	935	21.24		17-1	10 mM EDTA-treated FUS thawed at RT (18–20℃) for 3.5 hours	2187.5	1312.5	60.16
		15-2	40 mM EDTA-treated WU stored at RT for 3 days	2710	783	28.89		17-2	10 mM EDTA-treated FUS thawed at RT (18–20℃) for 3.5 hours	2475	1487.5	60.24
		15-3	40 mM EDTA-treated WU stored at RT for 3 days	5040	1230	24.36		17-3	10 mM EDTA-treated FUS thawed at RT (18–20℃) for 3.5 hours	1662.5	985	59.22
		16-1	40 mM EDTA-treated WU stored at RT for 7 days	2960	713	30.86		18-1	10 mM EDTA-treated FUS thawed at 37℃ for approximately 15 minutes	2300	1350	58.8
		16-2	40 mM EDTA-treated WU stored at RT for 7 days	3190	722	22.63		18-2	10 mM EDTA-treated FUS thawed at 37℃ for approximately 15 minutes	2325	1400	60.44
		16-3	40 mM EDTA-treated WU stored at RT for 7 days	2870	1020	35.42		18-3	10 mM EDTA-treated FUS thawed at 37℃ for approximately 15 minutes	2350	1400	59.98
	Abbreviations
			cfDNA → cell-free DNA
			ucfDNA → urinary cell-free DNA
			TDNA→Total DNA
			EDTA → ethylenediaminetetraacetic acid
			RT → room temperature
			WU → whole urine
			US → urine supernatant
			FUS → frozen urine supernatant
			FWU → frozen whole urine
			FUSS → FUS with postthawing secondary centrifugation
